# Supplementary material
Source: Springer Nature journal article supplement (https://www.springermedizin.de/resource/supplementary/12936_2011_2011_MOESM1_ESM.pdf/9542188)

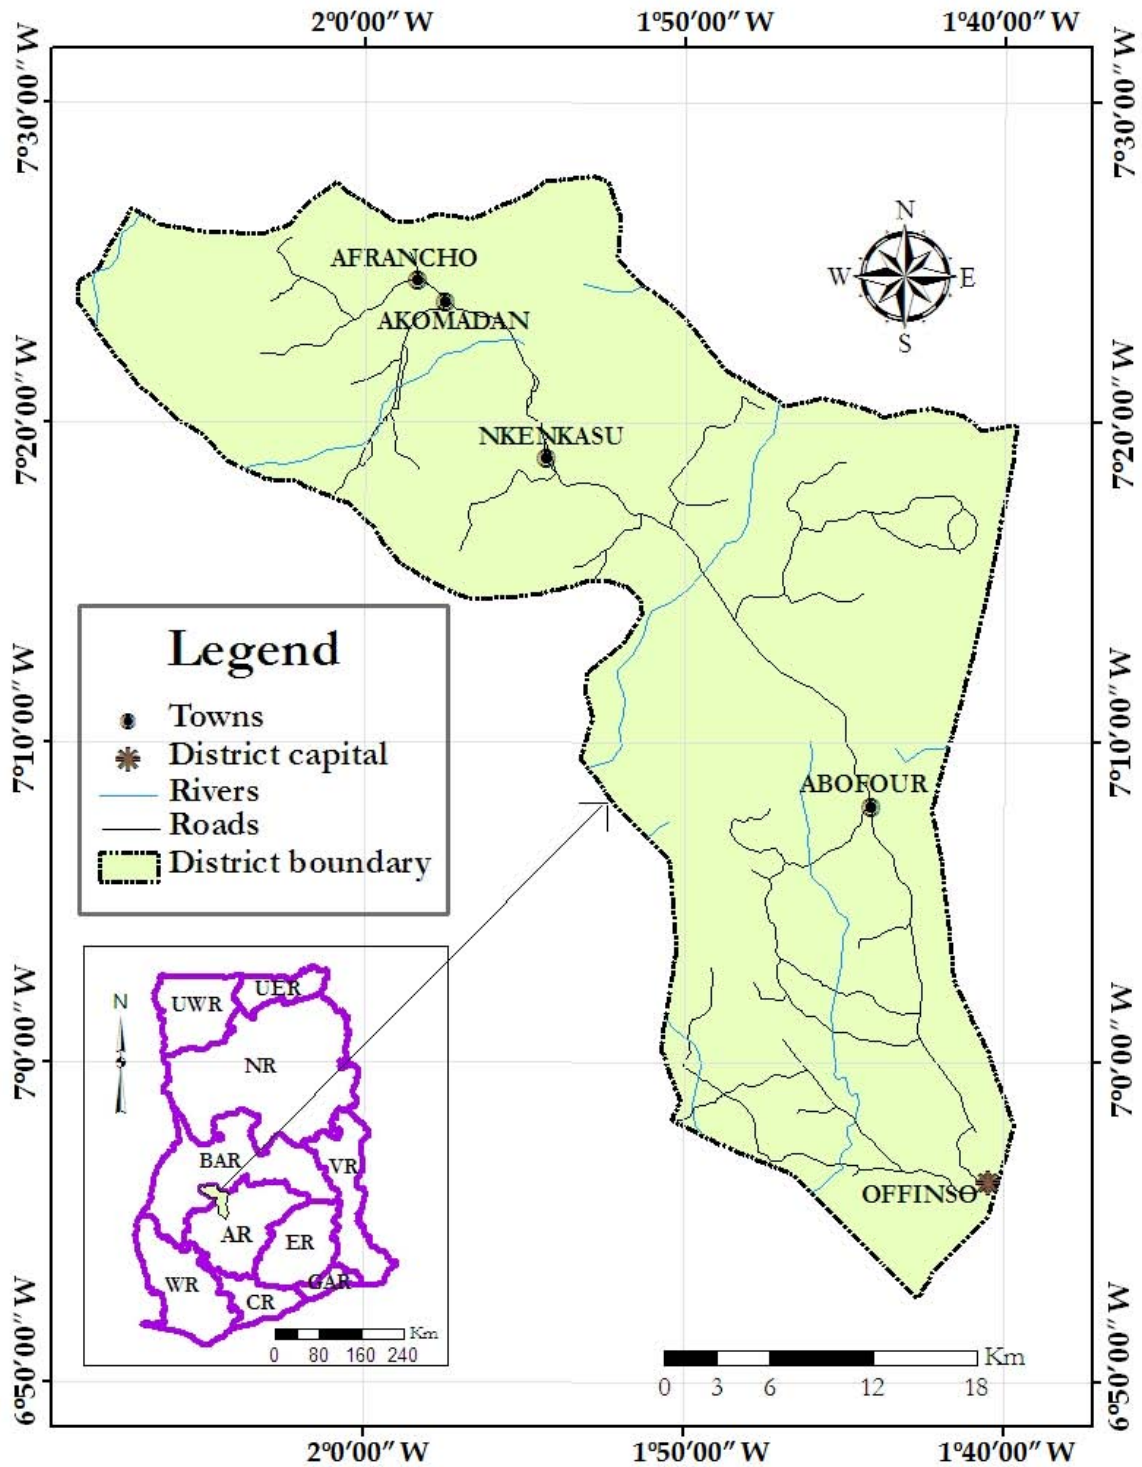

2°00'' W

1°50'' W

1°40'' W

7°30'' W

7°30'' W

7°20'' W

7°20'' W

7°10'' W

7°10'' W

7°00'' W

7°00'' W

6°50'' W

6°50'' W

2°00'' W

1°50'' W

1°40'' W

### Legend

- Towns
- \* District capital
- Rivers
- Roads
- ⋯ District boundary

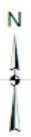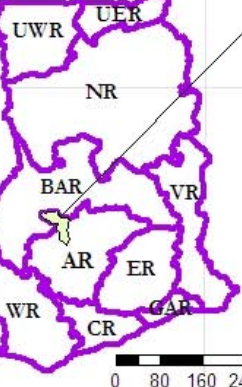

0 80 160 240 Km

0 3 6 12 18 Km

Supplement: MOESM1 [file 9542188]
